# Supplementary material for: Identifying the first folded alkylbenzene via ultraviolet, infrared, and Raman spectroscopy of pentylbenzene through decylbenzene
Source: Royal Society of Chemistry journal article supplement (doi:10.1039/c7sc02027a), 2017-01-01
Supplement: c7sc02027a1.pdf [file c7sc02027a1.pdf]

## Supplemental Information

# Identifying the First Folded Alkylbenzene via Ultraviolet, Infrared, and Raman Spectroscopy of Pentylbenzene through Decylbenzene

Daniel M. Hewett, Sebastian Bocklitz, Daniel P. Tabor,  
Edwin L. Sibert III,\* Martin A. Suhm, and Timothy S. Zwier\*

Department of Chemistry, Purdue University, West Lafayette IN, 47907  
Department of Chemistry, University of Wisconsin-Madison, Madison WI, 53706  
Institut für Physikalische Chemie, Universität Göttingen, Göttingen, Germany

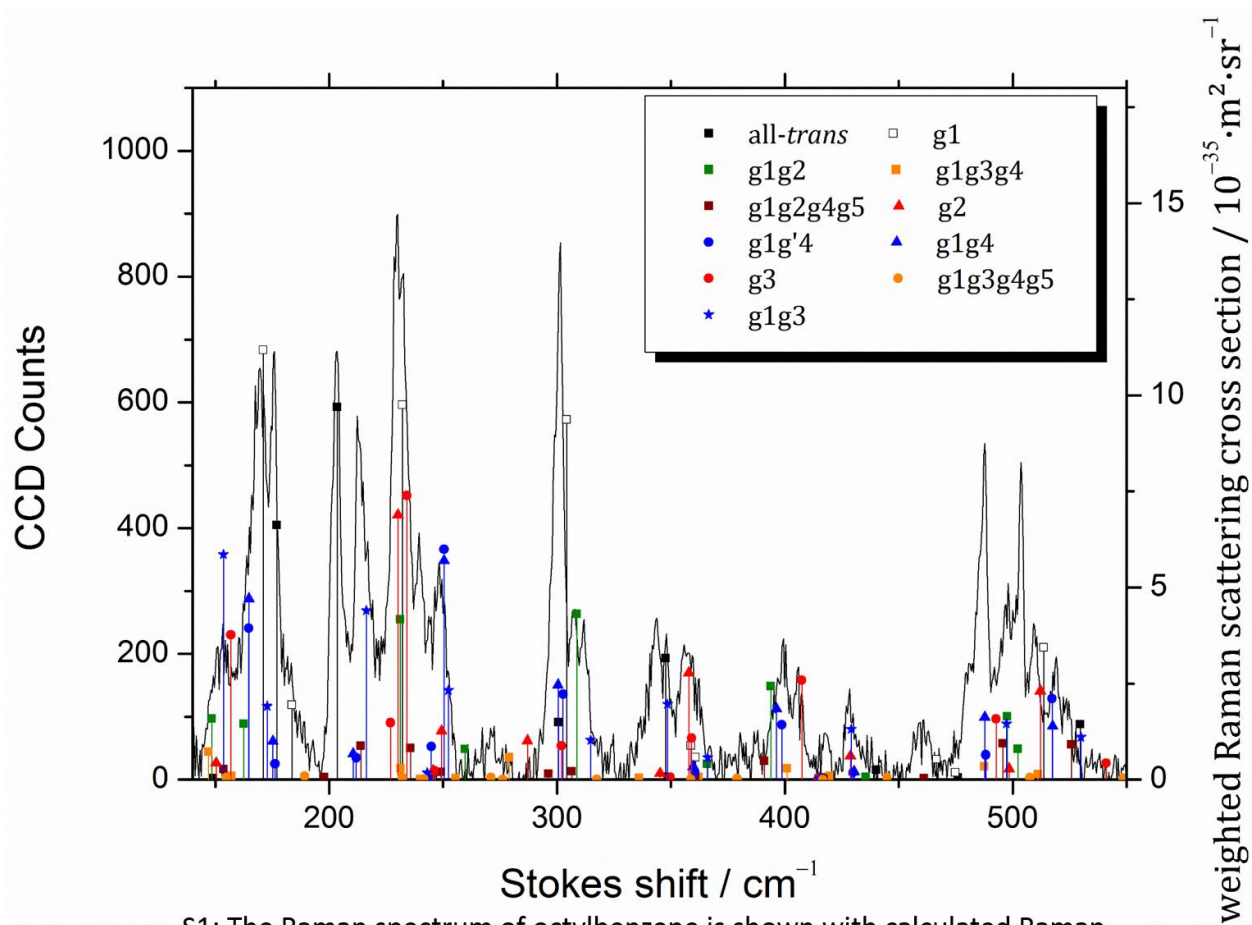

S1: The Raman spectrum of octylbenzene is shown with calculated Raman scattering cross sections scaled using the Gibbs free energies for the low energy conformations. The list of conformers included is not exhaustive, but instead uses only a selection of single, double, triple, and quadruple gauche conformations.

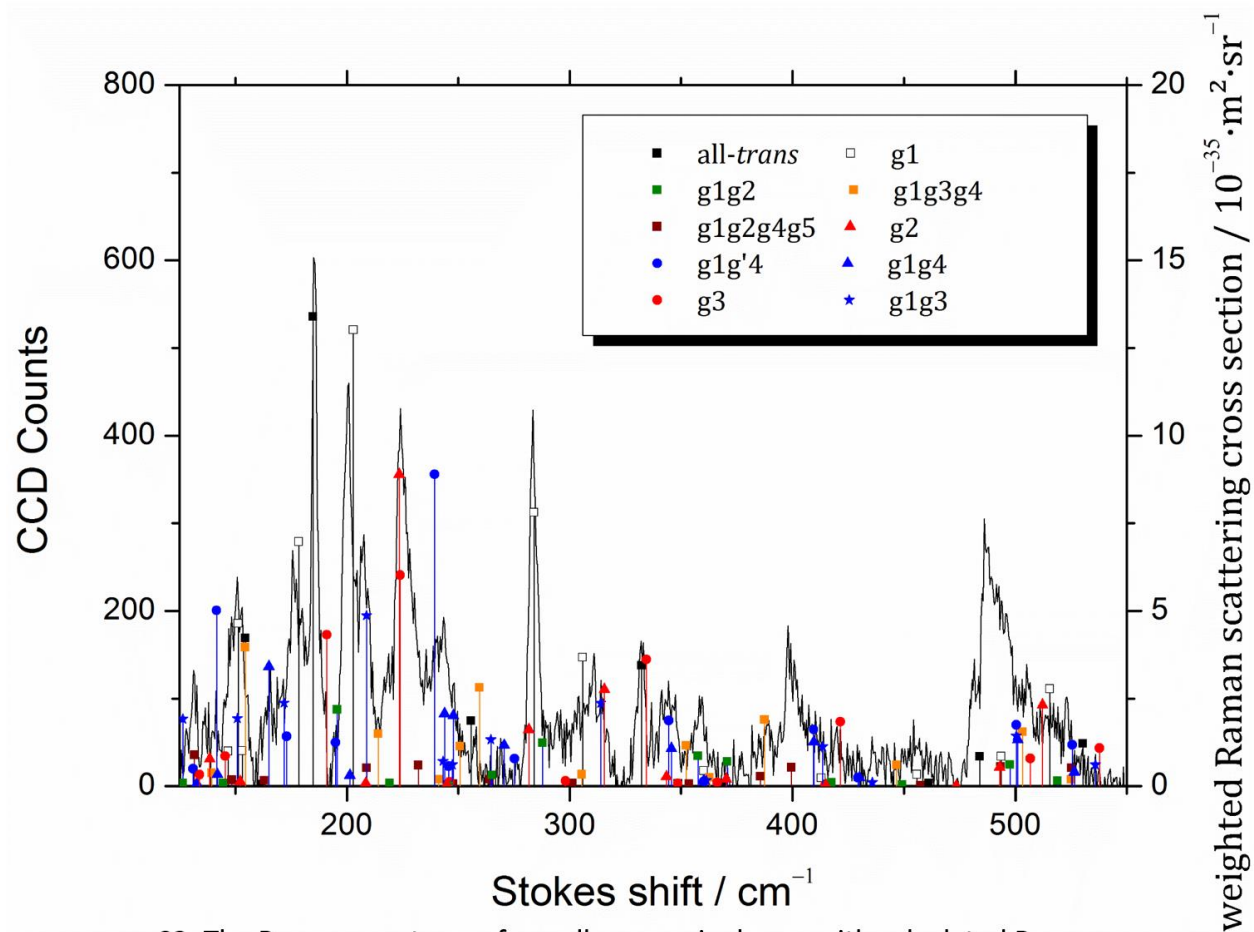

S2: The Raman spectrum of nonylbenzene is shown with calculated Raman scattering cross sections scaled using the Gibbs free energies for the low energy conformations. The list of conformers included is not exhaustive, but instead uses only a selection of single, double, triple, and quadruple gauche conformations.

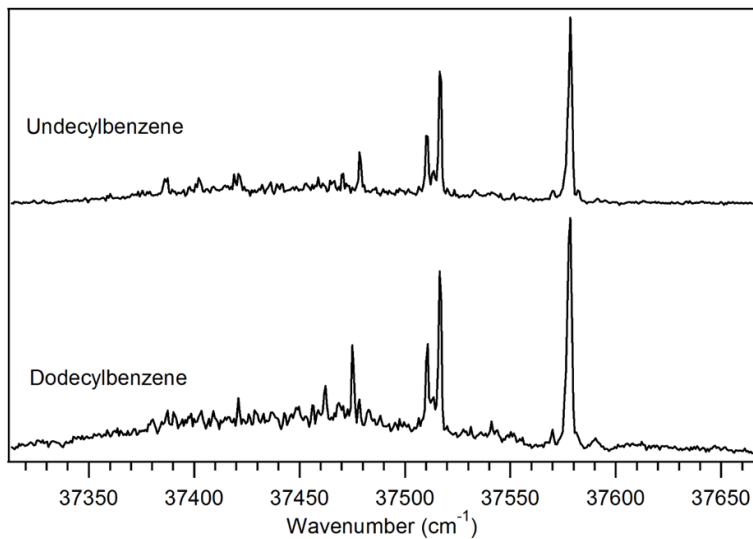

S3: UV Spectra for Undecylbenzene and Dodecylbenzene. These spectra show the rapid increase in activity below  $37500 \text{ cm}^{-1}$  as the chain length increases beyond eight carbon atoms.

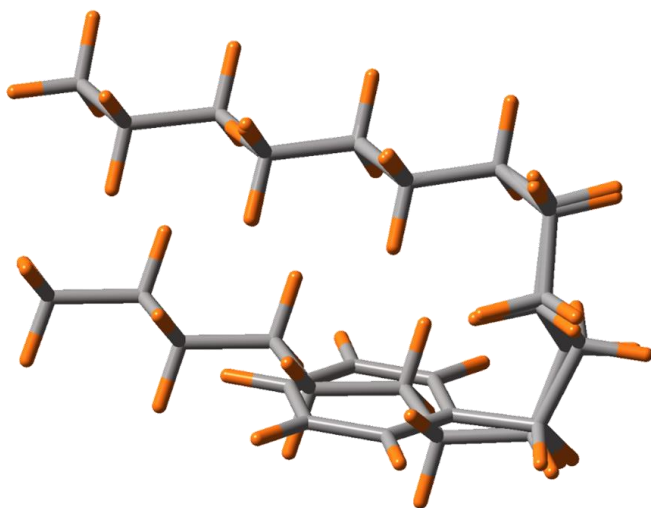

S4: Alkane folded structure overlaid with the g1g3g4 structure of octylbenzene. This overlay shows the similarity in the hairpin turns observed in both the pure alkanes and octylbenzene.

S5: Calculated Gibbs free energies for octylbenzene and nonylbenzene conformers at 298 K in the RRHO approximation.

| Octyl    | kJ/mol |
|----------|--------|
| trans    | 0      |
| g1       | 0      |
| g1g2     | 1      |
| g1g3g4   | 6      |
| g1g2g4g5 | 3      |
| g1g'4    | 1      |
| g1g4     | 1      |
| g3       | 1      |
| g2       | 1      |
| g1g3     | 1      |
| g1g3g4g5 | 7      |

| Nonyl    | kJ/mol |
|----------|--------|
| trans    | 0      |
| g1       | -1     |
| g1g3g4   | 2      |
| g1g2g4g5 | 5      |
| g1g'4    | 1      |
| g1g4     | 2      |
| g1g3     | 2      |
| g3       | 1      |
| g1g2     | 4      |
| g2       | 1      |
